# Supplementary material
Source: publisher site journal article supplement (https://www.dovepress.com/article/158545)

## Supplementary materials

**Supplementary Figure 1** - Effects of three APDs on 5-HT<sub>1A</sub> expression levels in the PFC (A''), CPu (B''), NAc (C'') and Hipp (D'') of female and male rats.

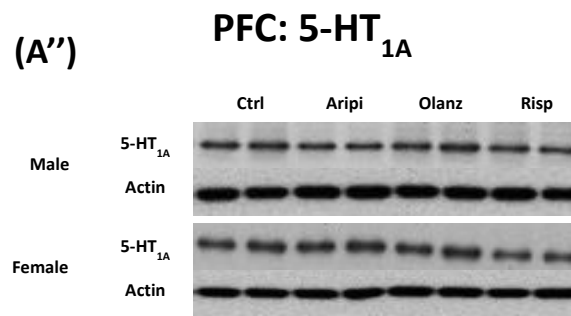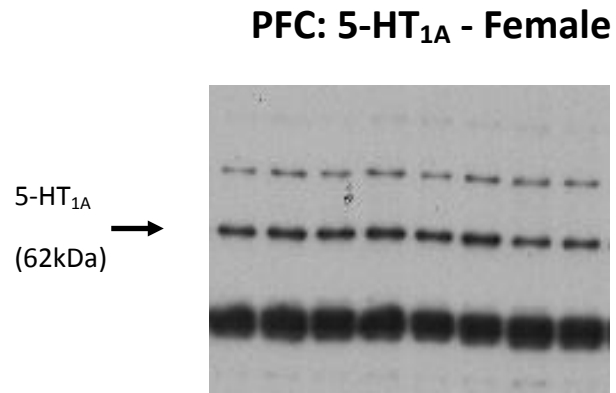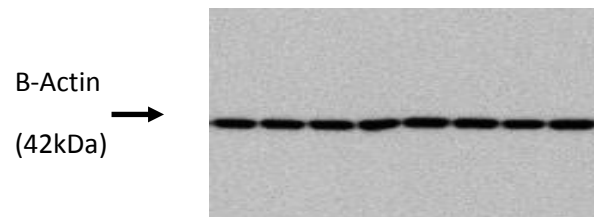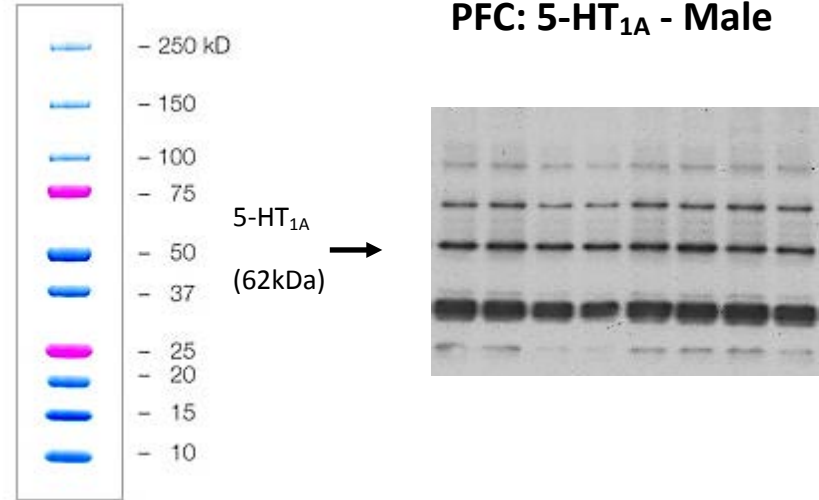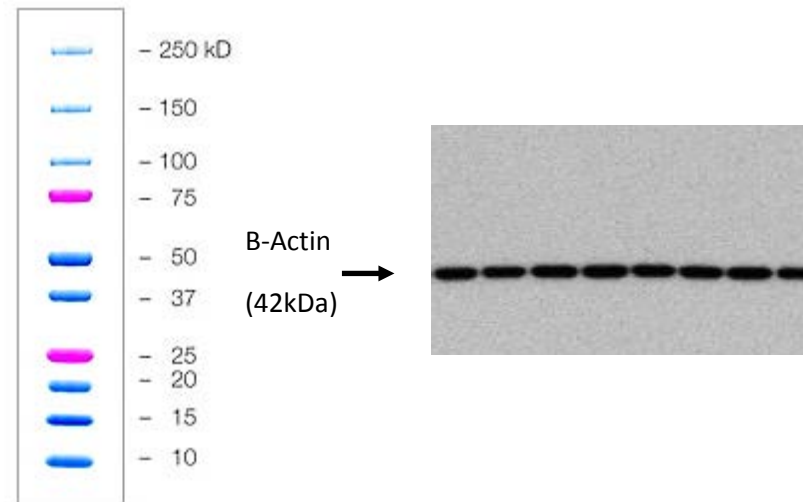

**Supplementary Figure 1** - Effects of three APDs on 5-HT<sub>1A</sub> expression levels in the PFC (A''), CPu (B''), NAc (C'') and Hipp (D'') of female and male rats.

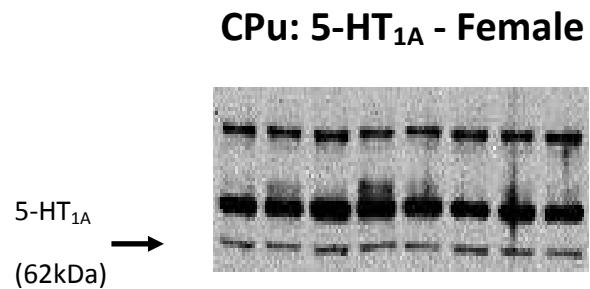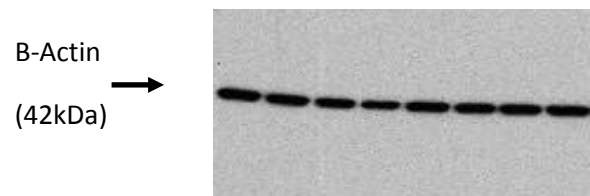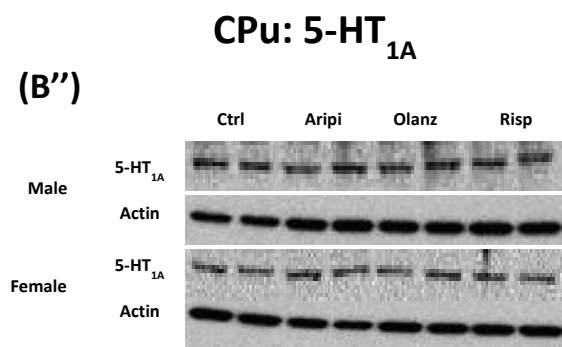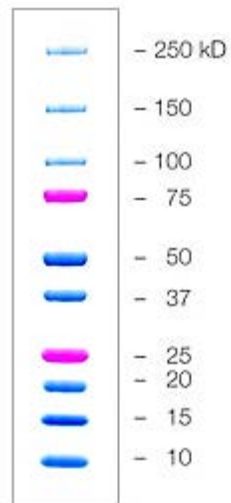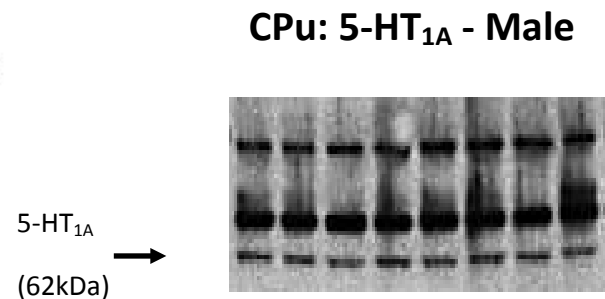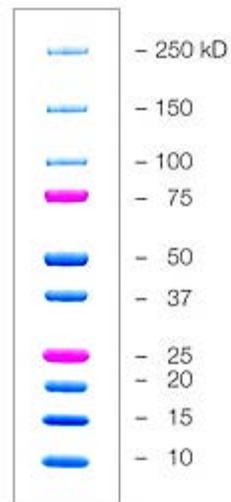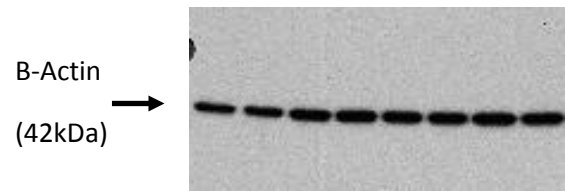

**Supplementary Figure 1** - Effects of three APDs on 5-HT<sub>1A</sub> expression levels in the PFC (A''), CPu (B''), NAc (C'') and Hipp (D'') of female and male rats.

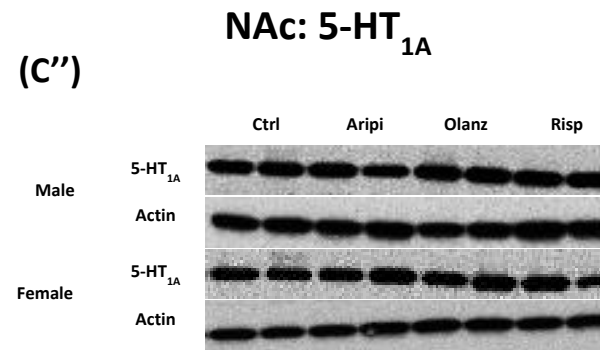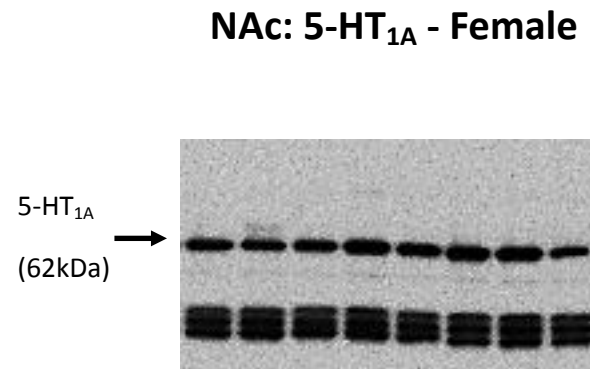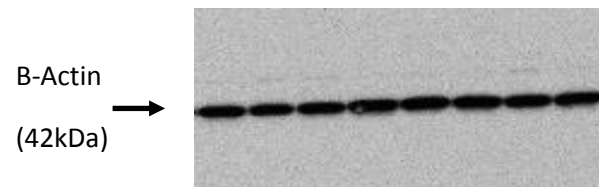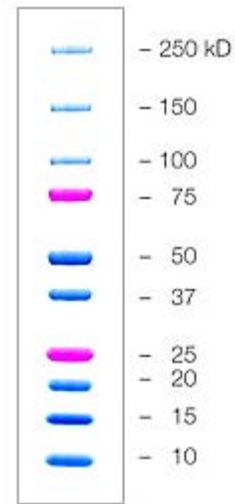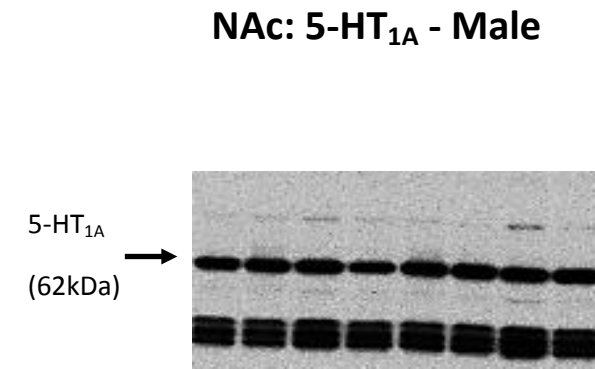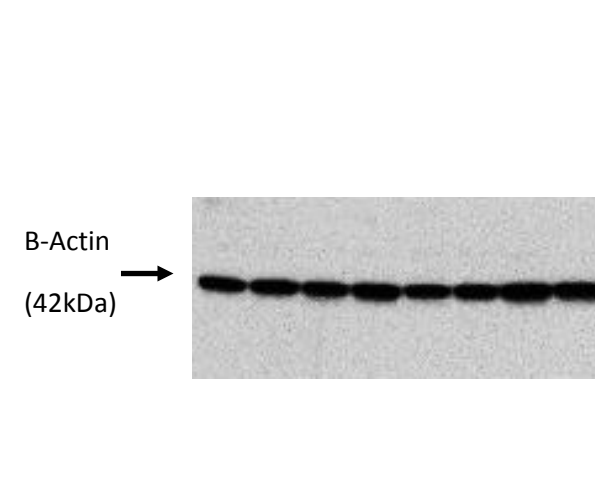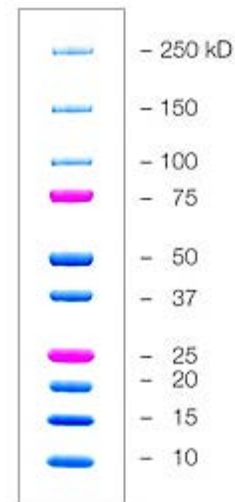

**Supplementary Figure 1** - Effects of three APDs on 5-HT<sub>1A</sub> expression levels in the PFC (A''), CPU (B''), NAc (C'') and Hipp (D'') of female and male rats.

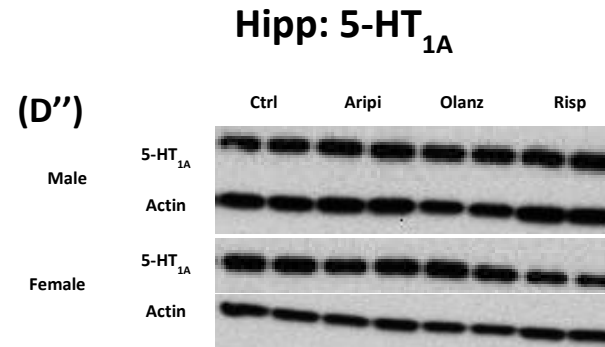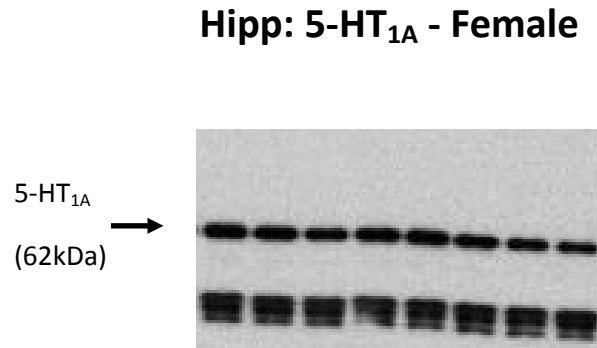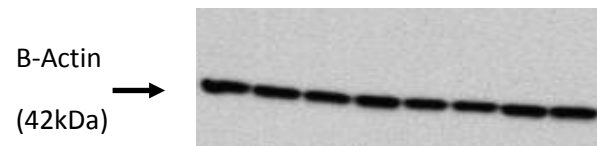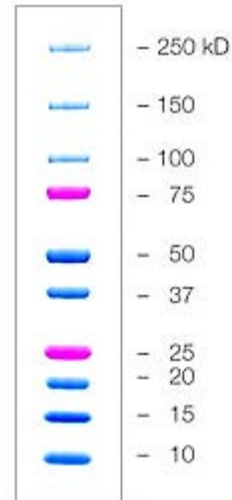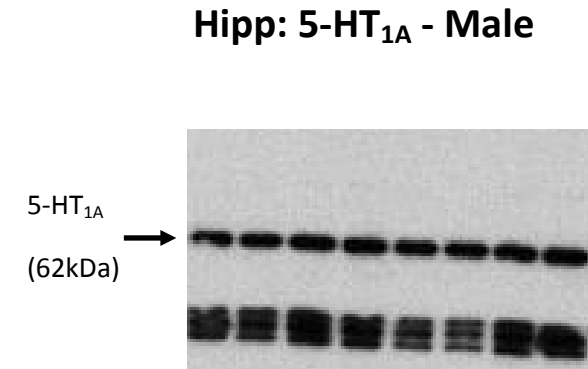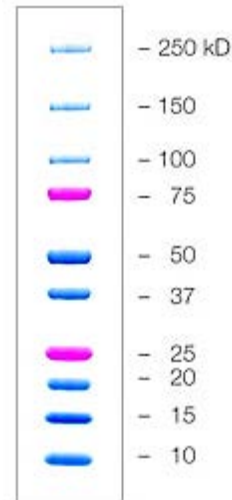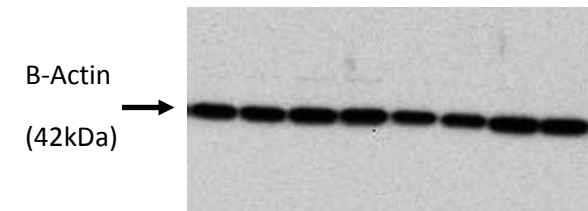

**Supplementary Figure 2** - Effects of three APDs on 5-HT<sub>2A</sub> expression levels in the PFC (A''), CPU (B''), NAc (C'') and Hipp (D'') of female and male rats.

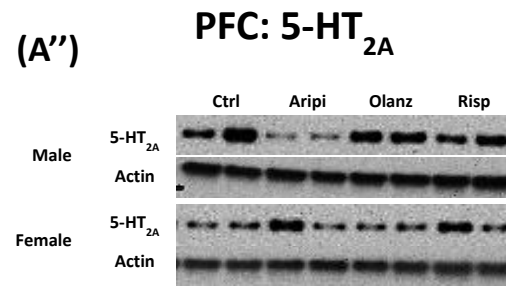

**PFC: 5-HT<sub>2A</sub> - Female**

5-HT<sub>2A</sub>  
(55kDa) →

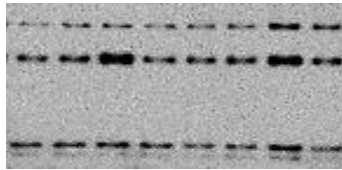

B-Actin  
(42kDa) →

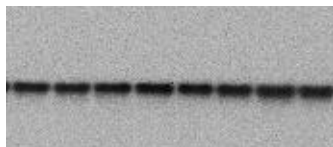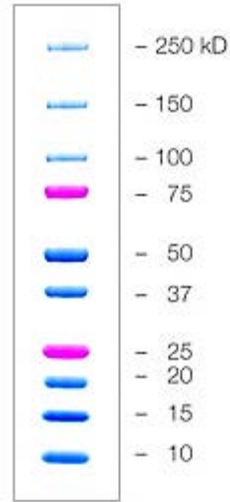

**PFC: 5-HT<sub>2A</sub> - Male**

5-HT<sub>2A</sub>  
(55kDa) →

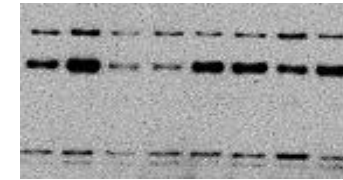

B-Actin  
(42kDa) →

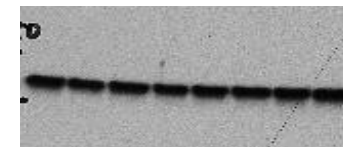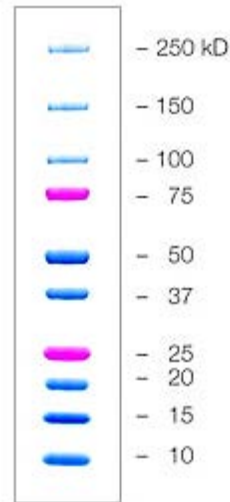

**Supplementary Figure 2** - Effects of three APDs on 5-HT<sub>2A</sub> expression levels in the PFC (A''), CPu (B''), NAc (C'') and Hipp (D'') of female and male rats.

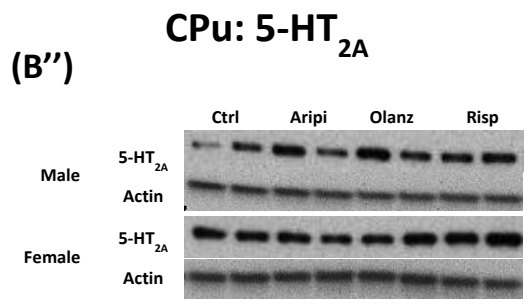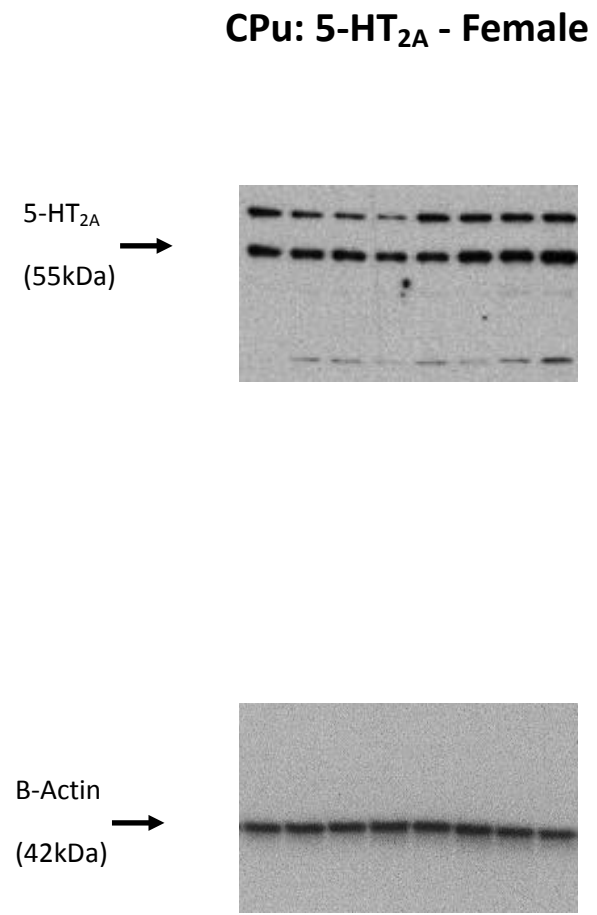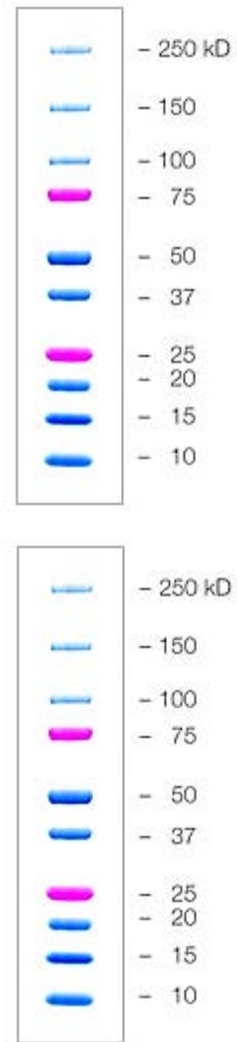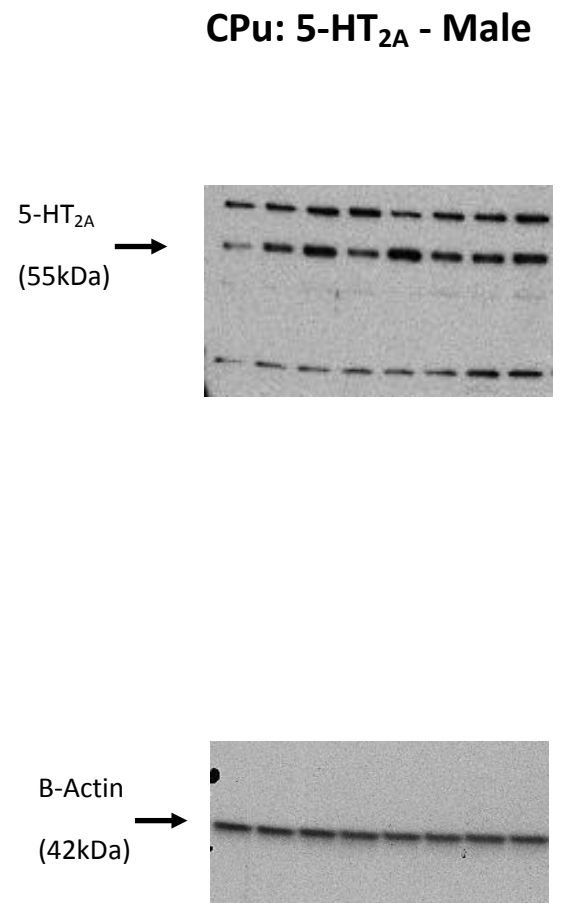

**Supplementary Figure 2** - Effects of three APDs on 5-HT<sub>2A</sub> expression levels in the PFC (A''), CPU (B''), NAc (C'') and Hipp (D'') of female and male rats.

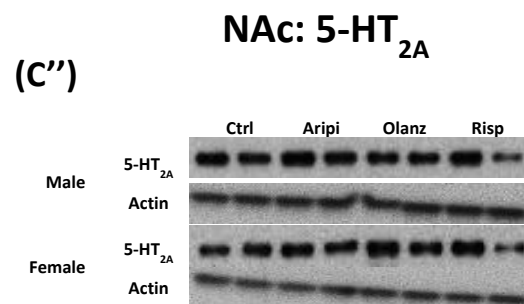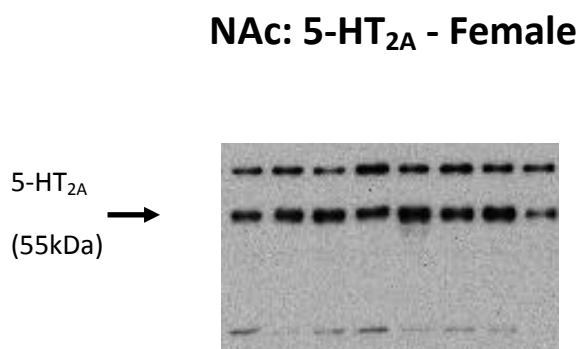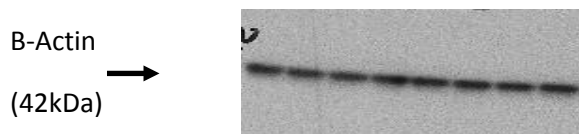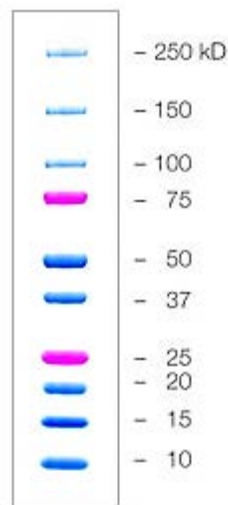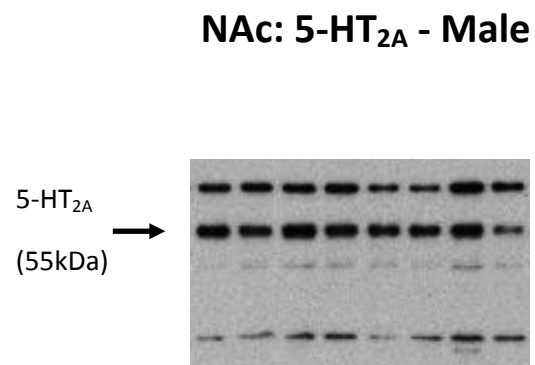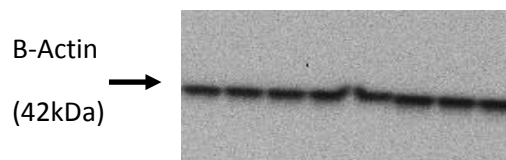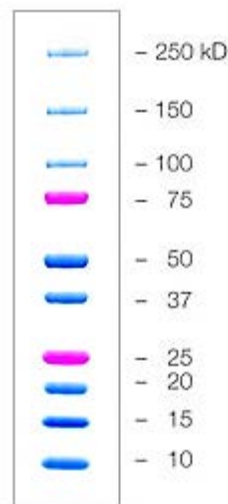



**Supplementary Figure 2** - Effects of three APDs on 5-HT<sub>2A</sub> expression levels in the PFC (A''), CPU (B''), NAc (C'') and Hipp (D'') of female and male rats.

**Hipp: 5-HT<sub>2A</sub>**

(D'')

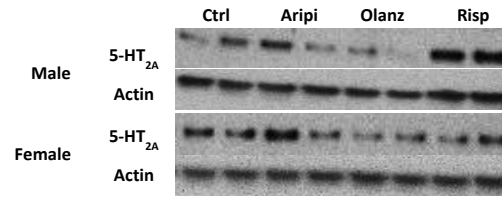

**Hipp: 5-HT<sub>2A</sub> - Female**

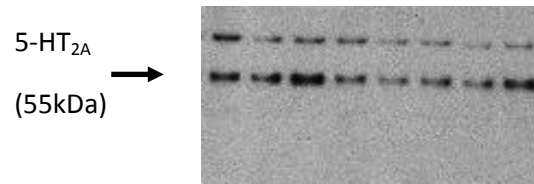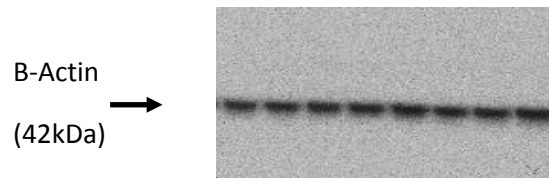

**Hipp: 5-HT<sub>2A</sub> - Male**

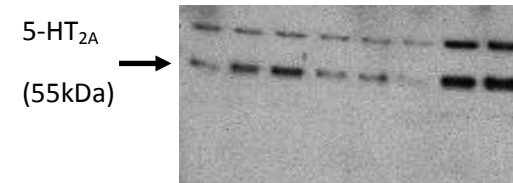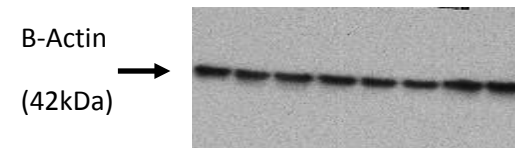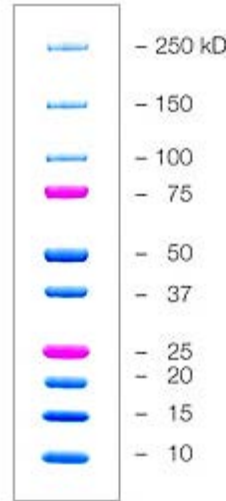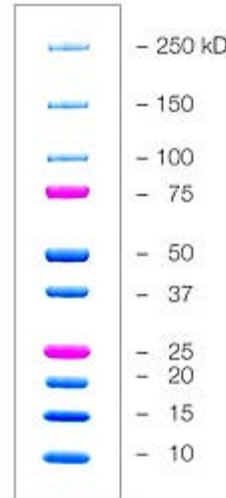

**Supplementary Figure 3** - Effects of three APDs on 5-HT<sub>2C</sub> expression levels in the PFC (A''), CPu (B''), NAc (C'') and Hipp (D'') of female and male rats.

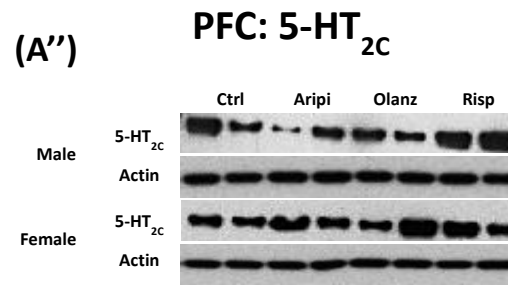

**PFC: 5-HT<sub>2C</sub> - Female**

5-HT<sub>2C</sub>  
(55kDa) →

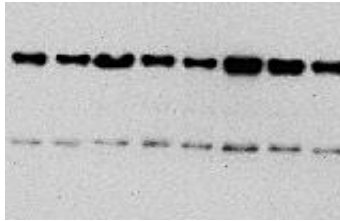

B-Actin  
(42kDa) →

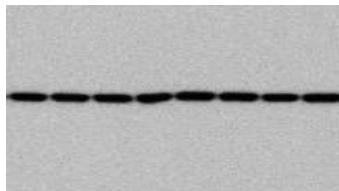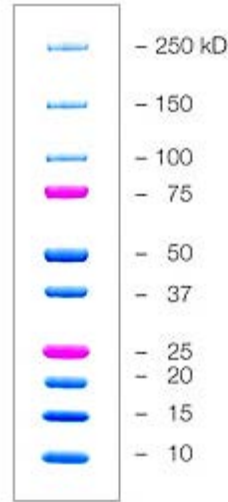

**PFC: 5-HT<sub>2C</sub> - Male**

5-HT<sub>2C</sub>  
(55kDa) →

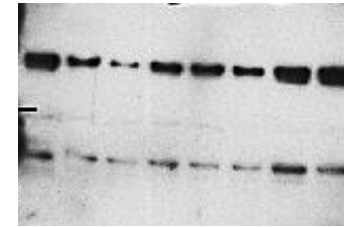

B-Actin  
(42kDa) →

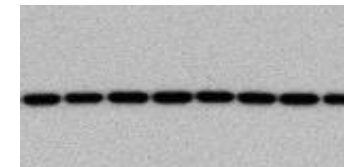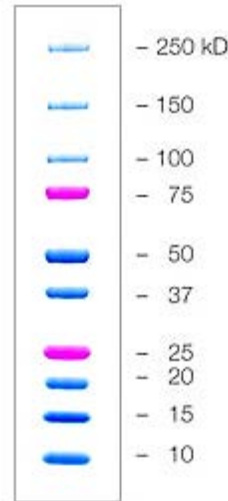

**Supplementary Figure 3** - Effects of three APDs on 5-HT<sub>2C</sub> expression levels in the PFC (A''), CPU (B''), NAc (C'') and Hipp (D'') of female and male rats.

### CPu: 5-HT<sub>2C</sub>

(B'')

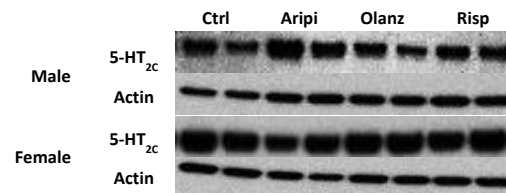

### CPu: 5-HT<sub>2C</sub> - Female

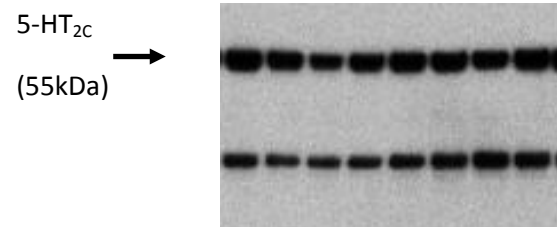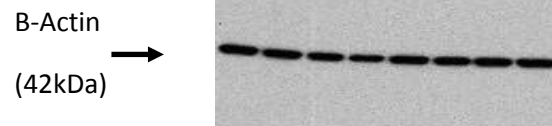

### CPu: 5-HT<sub>2C</sub> - Male

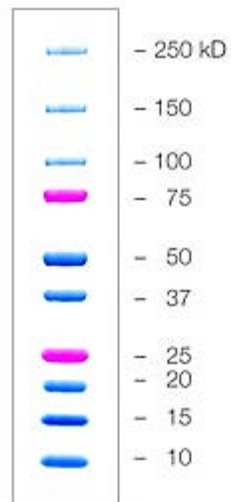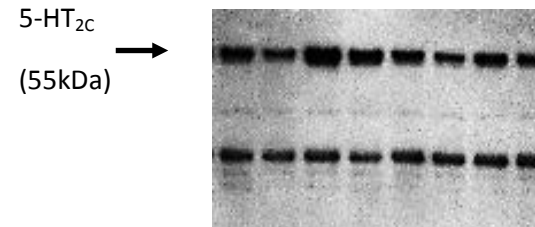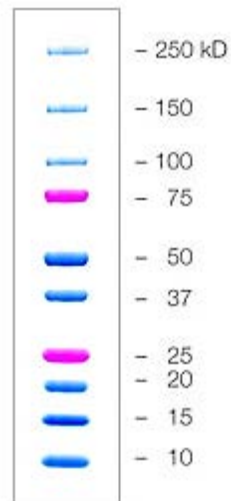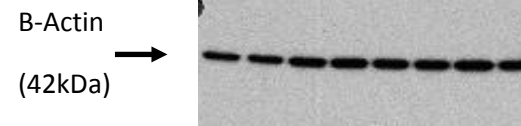

**Supplementary Figure 3** - Effects of three APDs on 5-HT<sub>2c</sub> expression levels in the PFC (A''), CPU (B''), NAc (C'') and Hipp (D'') of female and male rats.

### NAc: 5-HT<sub>2c</sub>

(C'')

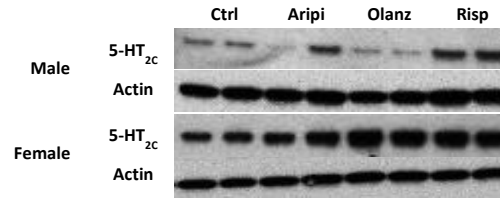

### NAc: 5-HT<sub>2c</sub> - Female

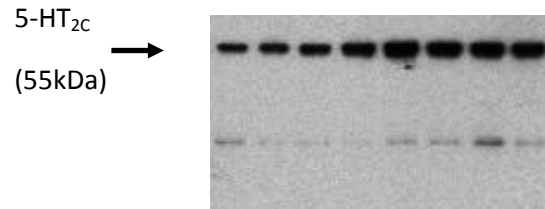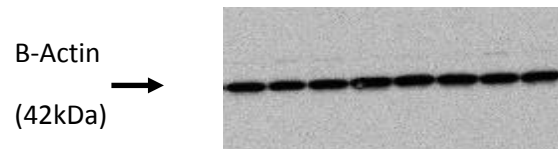

### NAc: 5-HT<sub>2c</sub> - Male

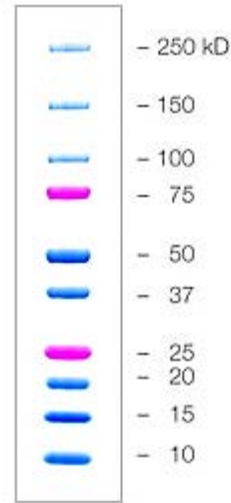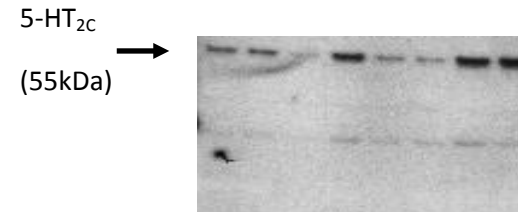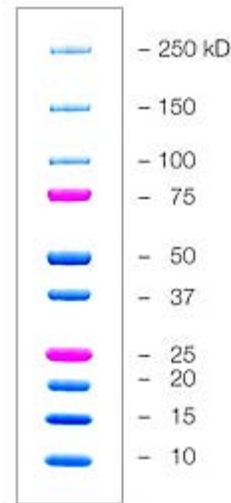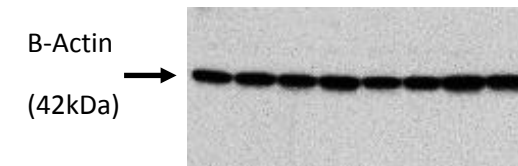

**Supplementary Figure 3** - Effects of three APDs on 5-HT<sub>2C</sub> expression levels in the PFC (A''), CPU (B''), NAc (C'') and Hipp (D'') of female and male rats.

### Hipp: 5-HT<sub>2C</sub>

(D'')

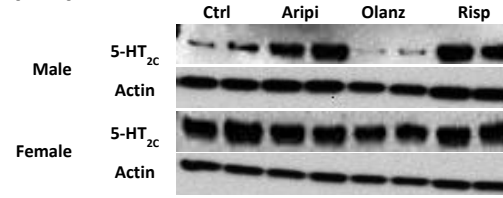

### Hipp: 5-HT<sub>2C</sub> - Female

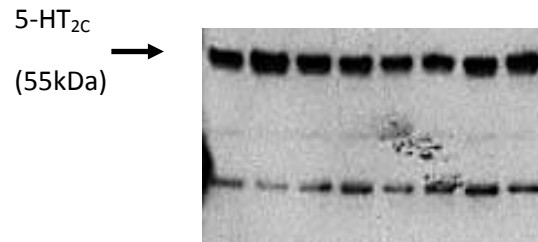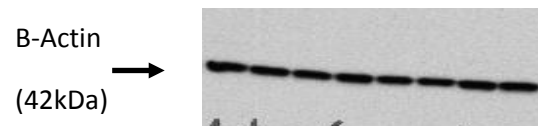

### Hipp: 5-HT<sub>2C</sub> - Male

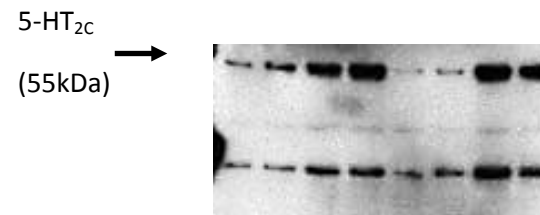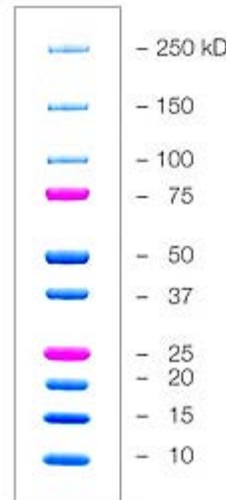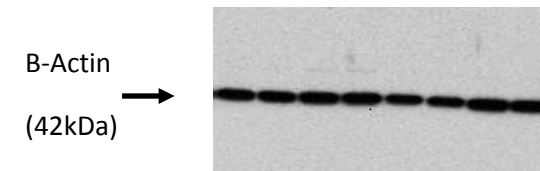

Supplement: Supplementary file 1 [file get_supplementary_file.php]
